# Supplementary material for: D-Amphetamine Rapidly Reverses Dexmedetomidine-Induced Unconsciousness in Rats
Source: PubMed Central journal article supplement (PMC8167047; doi:10.3389/fphar.2021.668285), 2021-05-18
Supplement: Image1.pdf [file Image1.pdf]

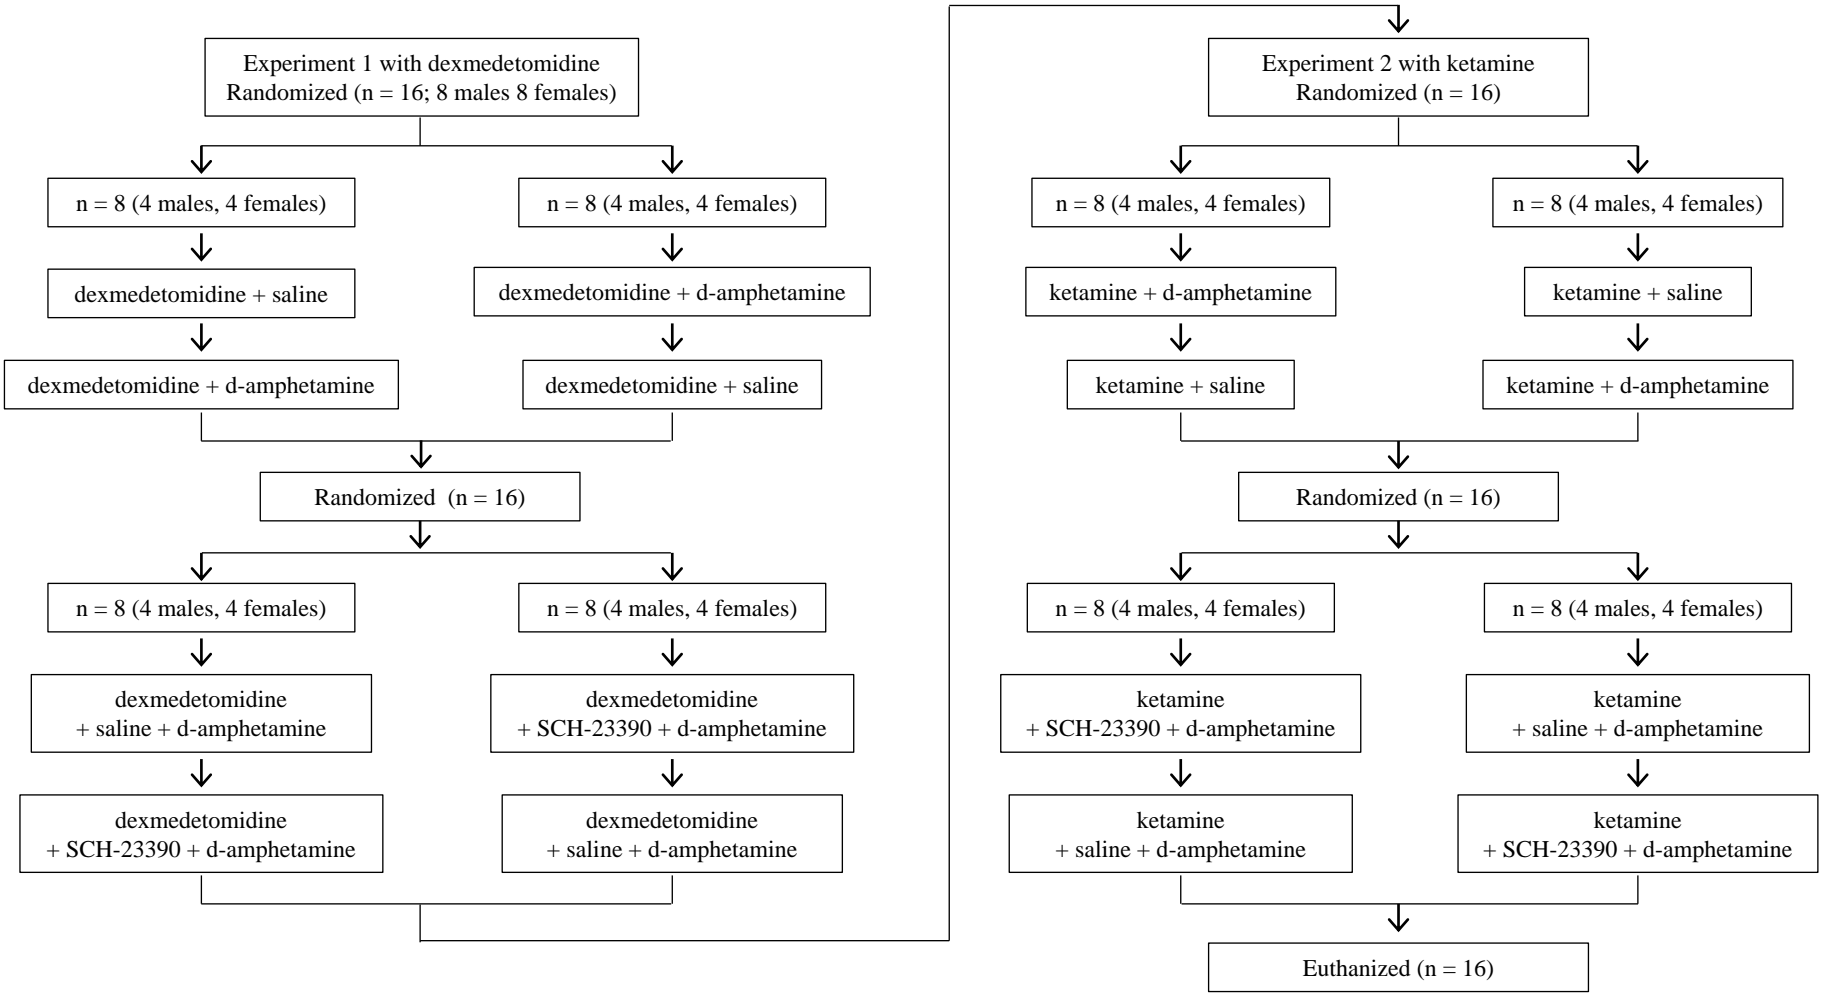

Flow-chart of behavioral experiments
