# Supplementary material for: D-Amphetamine Rapidly Reverses Dexmedetomidine-Induced Unconsciousness in Rats
Source: PubMed Central journal article supplement (PMC8167047; doi:10.3389/fphar.2021.668285), 2021-05-18
Supplement: Image2.pdf [file Image2.pdf]

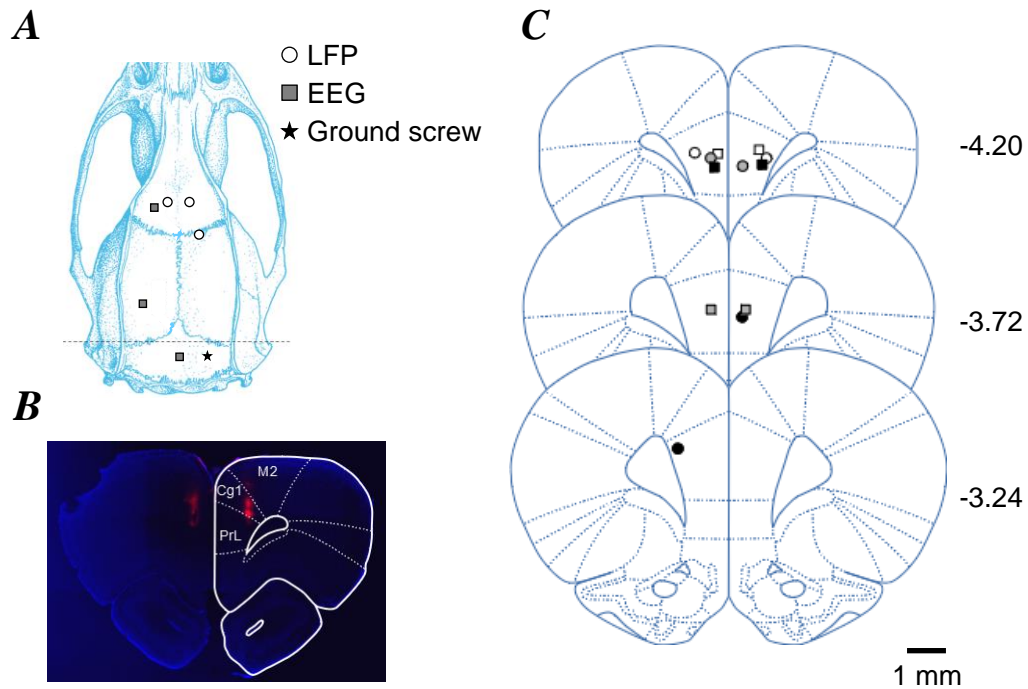

**Histological analysis of LFP electrode locations.**

**A.** Schematic of targeted sites over a rat skull. Symbols represent locations where LFP (white circles) and EEG electrodes (gray squares, prefrontal cortex, parietal cortex, and cerebellum), and ground screws (black star) were placed. **B.** A representative coronal section mounted with DAPI. Probe locations are confirmed by DiI. **C.** Locations of the LFP electrodes in all 6 rats. LFP electrodes were inserted bilaterally in the PFC, and each symbol indicates the probe location from each rat. Numbers indicate anterior-posterior position relative to bregma. Tetrodes in the right PFC spanned 4.2–3.7mm AP, 0.4–1.0mm ML, and 3.4–3.9mm DV, and in the left PFC spanned 4.2–3.2mm AP, -0.2 to -1.3 mm ML, and 3.1–3.8mm DV. PrL, prelimbic cortex; Cg1, cingulate cortex area 1; M2, secondary motor cortex.
